# Supplementary material for: Novel group of podovirus infecting the marine bacterium Alteromonas macleodii
Source: PubMed Central journal article supplement — Bacteriophage. 2013 Apr 1;3(2):e24766. doi: 10.4161/bact.24766 (PMC3821669; doi:10.4161/bact.24766), 2013-04-01
Supplement: bact-3-e24766-s01.pdf [file bact-3-e24766-s01.pdf]

## **Supplemental Material to:**

**Inmaculada Garcia-Heredia, Francisco Rodriguez-Valera  
and Ana-Belen Martin-Cuadrado**

**Novel group of podovirus infecting the marine bacterium  
*Alteromonas macleodii***

**Bacteriophage 2013; 3(2)**

**<http://dx.doi.org/10.4161/bact.24766>**

**<http://dx.doi.org/10.4161/bact.24766>**

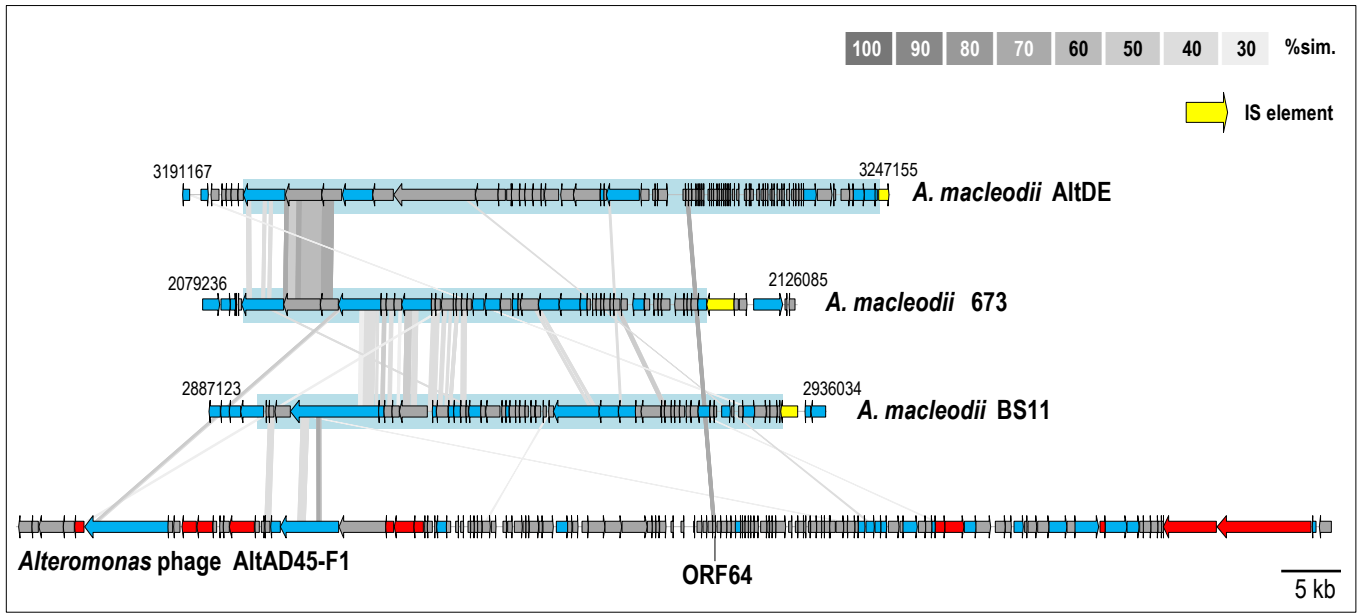

**Supplementary Figure 1.** Genomic comparison of AltAD45-P1 phage with specific regions (see main text) of *A. macleodii* 673, BS11 and AltDE strains. The arrows represent the predicted ORFs. Conserved genomic regions are indicated by grey shaded areas. Conserved ORFs with N4-like viruses are red coloured and in blue, ORFs with assigned functions.

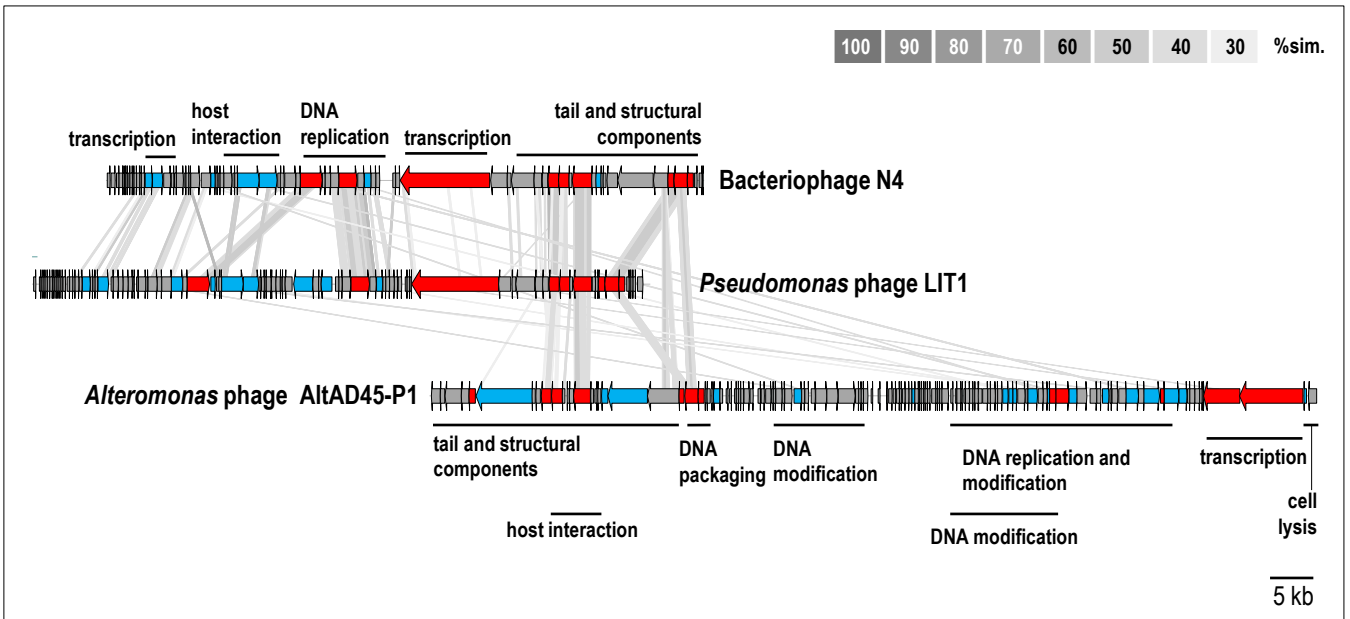

**Supplementary Figure 2.** Genomic comparison of *Enterobacter* phage N4, *Pseudomonas* phage LIT1 and AltAD45-P1. The arrows represent the predicted ORFs. Conserved genomic regions are indicated by grey shaded areas. Conserved ORFs with N4-like viruses are red coloured and in blue ORFs with assigned functions.

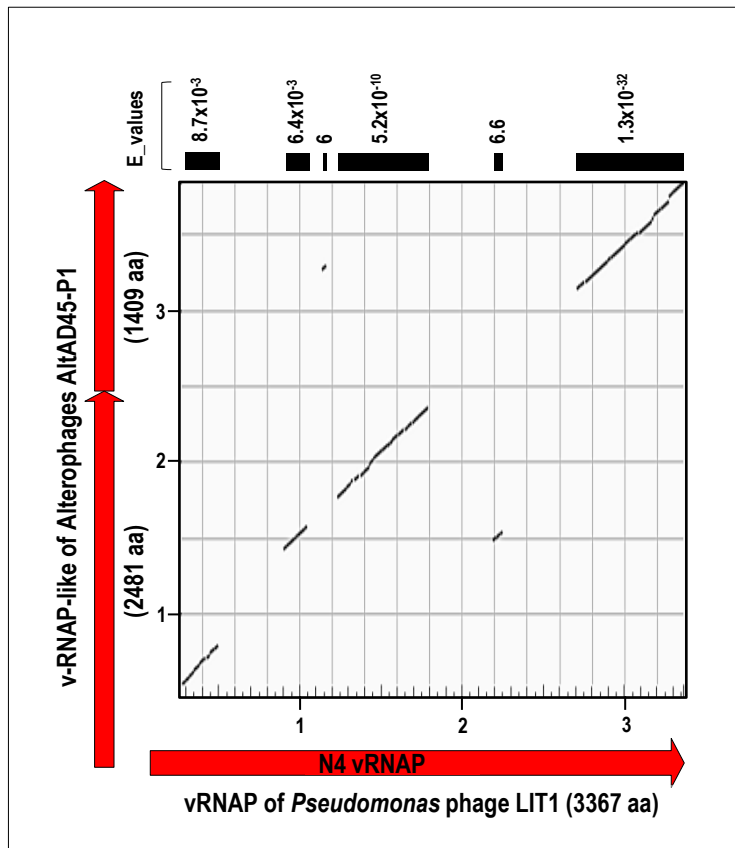

**Supplementary Figure 3.** Dot matrix view showing the regions of similarity based upon BLASTP results between the vRNAP protein of *Pseudomonas* phage LIT1 (X-axis) and the N4-gp50-like proteins present in Alterophage AltAD45-P1 (Y-axis). Alignments are shown in the plot as lines. E\_values are indicated in the upper panel.

1 **SUPPLEMENTARY MATERIAL**

2

3 **SUPPLEMENTARY TABLES**

4

5 **Supplementary Table 1. Details of the AltAD45-phages sequencing.**

| <b>phage</b>      | <b>Platform</b>    | <b># reads</b> | <b>Average read length (pb)</b> | <b>Coverage (X-fold)</b> | <b># contigs assembled</b> |
|-------------------|--------------------|----------------|---------------------------------|--------------------------|----------------------------|
| <b>AltAD45-P1</b> | 454, GS-FLX system | 11910          | 717.9                           | 82.28                    | 1                          |
| <b>AltAD45-P2</b> | 454, GS-FLX system | 8153           | 709.7                           | 55.62                    | 1                          |
| <b>AltAD45-P3</b> | 454, GS-FLX system | 20748          | 443.45                          | 90.45                    | 1                          |
| <b>AltAD45-P4</b> | 454, GS-FLX system | 16590          | 676.19                          | 111.49                   | 1                          |

6

7
